## RESEARCH ARTICLE

# Verbal autopsy analysis of childhood deaths in rural Gambia

Baleng Mahama Wutor<sup>1\*</sup>, Isaac Osei<sup>1,2</sup>, Lobga Babila Galega<sup>1</sup>, Esu Ezeani<sup>1</sup>, Williams Adefila<sup>1</sup>, Ilias Hossain<sup>1</sup>, Golam Sarwar<sup>1</sup>, Grant Mackenzie<sup>1,2,3,4</sup>

**1** Medical Research Council Unit The Gambia at London School of Hygiene & Tropical Medicine, Fajara, The Gambia, **2** Faculty of Infectious and Tropical Diseases, London School of Hygiene & Tropical Medicine, London, United Kingdom, **3** Murdoch Children's Research Institute, Melbourne, Australia, **4** Department of Paediatrics, University of Melbourne, Melbourne, Australia

\* [bwutor@mrc.gm](mailto:bwutor@mrc.gm)

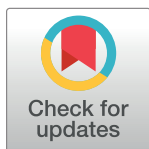

## Abstract

### Background

In low-resource settings, it is challenging to ascertain the burden and causes of under-5 mortality as many deaths occur outside health facilities. We aimed to determine the causes of childhood deaths in rural Gambia using verbal autopsies (VA).

### Methodology

We used WHO VA questionnaires to conduct VAs for deaths under-5 years of age in the Basse and Fuladu West Health and Demographic Surveillance Systems (HDSS) in rural Gambia between September 01, 2019, and December 31, 2021. Using a standardized cause of death list, two physicians assigned causes of death and discordant diagnoses were resolved by consensus.

### Results

VAs were conducted for 89% (647/727) of deaths. Of these deaths, 49.5% (n = 319) occurred at home, 50.1% (n = 324) in females, and 32.3% (n = 209) in neonates. Acute respiratory infection including pneumonia (ARIP) (33.7%, n = 137) and diarrhoeal diseases (23.3%, n = 95) were the commonest primary causes of death in the post-neonatal period. In the neonatal period, unspecified perinatal causes of death (34.0%, n = 71) and deaths due to birth asphyxia (27.3%, n = 57) were the commonest causes of death. Severe malnutrition (28.6%, n = 185) was the commonest underlying cause of death. In the neonatal period, deaths due to birth asphyxia (p-value < 0.001) and severe anaemia (p-value = 0.03) were more likely to occur at hospitals while unspecified perinatal deaths (p-value = 0.01) were more likely to occur at home. In the post-neonatal period, deaths due to ARIP (p-value = 0.04) and diarrhoeal disease (p-value = 0.001) were more likely to occur among children aged 1–11 months and 12–23 months respectively.

## OPEN ACCESS

**Citation:** Wutor BM, Osei I, Babila Galega L, Ezeani E, Adefila W, Hossain I, et al. (2023) Verbal autopsy analysis of childhood deaths in rural Gambia. PLoS ONE 18(7): e0277377. <https://doi.org/10.1371/journal.pone.0277377>

**Editor:** Engelbert Adamwaba Nonterah, Navrongo Health Research Centre, GHANA

**Received:** October 24, 2022

**Accepted:** June 15, 2023

**Published:** July 6, 2023

**Copyright:** © 2023 Wutor et al. This is an open access article distributed under the terms of the [Creative Commons Attribution License](https://creativecommons.org/licenses/by/4.0/), which permits unrestricted use, distribution, and reproduction in any medium, provided the original author and source are credited.

**Data Availability Statement:** All relevant data are within the paper and its [Supporting information files](#).

**Funding:** The author(s) received no specific funding for this work.

**Competing interests:** The authors have declared that no competing interests exist.

## Conclusion

According to VA analysis of deaths identified within two HDSS in rural Gambia, half of deaths amongst children under-5 in rural Gambia occur at home. ARIP and diarrhoea, and the underlying cause of severe malnutrition remain the predominant causes of child mortality. Improved health care and health-seeking behaviour may reduce childhood deaths in rural Gambia.

## Introduction

Reliable data on under-5 mortality is needed to effectively track progress towards attaining Sustainable Development Goal 3.2 which seeks to reduce neonatal and under-5 mortality to 12 and 25 per 1000 live births respectively by 2030 [1]. Globally, under-5 deaths in 2019 were estimated to be about 5.2 million [2]. More than half of these deaths occurred in Sub-Saharan Africa. Accurate mortality data is essential not only for planning and research purposes but also for measuring the impact of health interventions [3]. This is especially important in low and middle-income countries (LMICs) where resources are limited and need to be prioritized [4].

Although progress has been made in gathering data for evidence-based decision-making in child health, major gaps still exist [5]. Whereas death registration coverage is nearly 100% in the World Health Organisation (WHO) European Region, coverage is less than 10% in the African Region [6]. Even where Civil Registration and Vital Statistics (CRVS) systems exist in LMICs, they are often weak and incomplete [7]. Apart from the weak systems in these countries, a significant number of deaths in rural communities occur at home or health posts. Such deaths are not likely to be recorded and consequently, a cause of death will not be assigned. This paucity of mortality data tends to further perpetuate health inequalities [8].

Where Health and Demographic Surveillance Systems (HDSS) exist, they help fill this gap by ensuring that all deaths within those areas are captured [9]. This is especially useful in countries with weak CRVS systems and in areas where deaths occur at home and are not reported. However, to better understand the causes and circumstances within which these deaths occurred, the verbal autopsy (VA) tool was developed and refined over several years [6,10,11]. A VA tool is a structured questionnaire that is used to ascertain the cause of death by interviewing caregivers or the next of kin who were present during the illness and at the time of the death [6]. The caregiver or next of kin is asked about the signs and symptoms the deceased exhibited in the immediate days preceding their demise.

Verbal autopsy information is used to determine a cause of death using various methods. Some of these methods include physician-certified verbal autopsy (PCVA) [12] and computer-based probabilistic methods [13,14]. The widely used method of VA in sub-Saharan Africa is the PCVA which typically involves two physicians who assign a cause of death based on the information recorded in the VA interview [12,15]. Most validation studies have shown VA to be a reliable way to ascertain causes of death in the absence of robust CRVS systems [16]. Even though PCVA can be time-consuming and expensive to undertake, it remains a valuable tool for assigning causes for deaths occurring outside the healthcare setting [17]. Given its widespread usage, PCVA has been the most validated type of VA [15].

In this study, we sought to characterise causes of death assigned using PCVA within the Basse and Fuladu West HDSS sites in The Gambia.

## Methodology

### Study setting

The study was conducted in the Basse and Fuladu West HDSS sites located in the eastern part of The Gambia. The Gambia is a small country in West Africa with a population of about 2.4 million. According to the 2018 Gambia Multiple Indicator Cluster Survey, 15.4% of the population are children under-5 years of age and the mortality in this age group is about 57 per 1,000 live births [18].

In 2007, The Medical Research Council Unit The Gambia (MRCG) at the London School of Hygiene and Tropical Medicine (LSHTM) established the Basse HDSS in the Upper River Region of the Gambia (Fig 1). The Basse HDSS has been vital in the conduct of several large field studies [19–21]. It is located on the south bank of the River Gambia and covers an area of approximately 1,100 km<sup>2</sup>. This mostly rural area is inhabited by approximately 202,000 residents with 225 villages. Children aged less than 5 years make up 19% of the population. The Serahule and Fula tribes are the commonest ethnic groups in the area. The months from June to October experience a wet season, while the remaining months are dry.

The Fuladu West HDSS is located in the Central River Region and extends towards the west along the south bank of the River Gambia. It is made up of 213 villages with a total population of 99,113. The main hospital in the area is Bansang Hospital which receives referrals from the Central River Region as well as Upper River Region. The Basse and Fuladu West HDSSs currently support the cluster-randomized Pneumococcal Vaccine Schedules clinical trial [22].

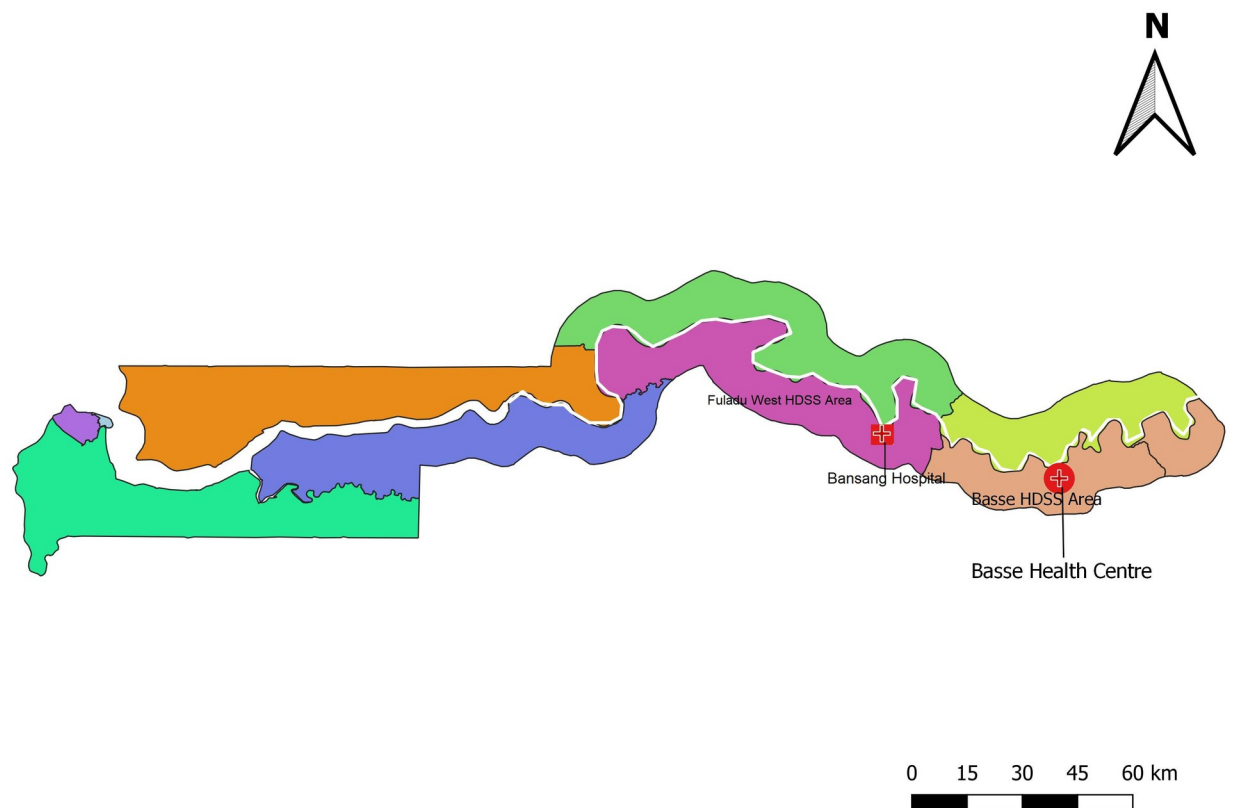

**Fig 1. Map of The Gambia highlighting the Basse and Fuladu West HDSS sites.**

<https://doi.org/10.1371/journal.pone.0277377.g001>

## Study design

This cross-sectional observational study was conducted between September 01, 2019, and December 31, 2021. All deaths of children under-5 who were residents of any of the two HDSSs were eligible for inclusion in the study. Residency was defined as living within the HDSSs in the last 4 months as confirmed by HDSS records. Verbal autopsies were conducted for 647 of 727 (89%) detected deaths of children aged less than 5 years during the observation period. 80 VAs could not be conducted because the caregivers who were present during the period of illness had migrated out of the HDSS sites and could not be traced.

## Procedure

The VAs were coded by two pairs of physicians, all of whom were active in paediatric care in the two main referral hospitals in the study area (Basse and Bansang). They were specifically trained on how to code deaths using the PCVA method as part of safety surveillance for the Pneumococcal Vaccine Schedule study [22]. Each physician worked independently to assign a probable cause of death based on the information captured in the VA using their clinical judgement. In each case, a primary and underlying cause of death was coded. The disease condition or terminal event which occurred just before the death was selected as the primary cause of death. The morbid condition or injury which initiated the chain of events leading to the death was selected as the underlying cause of death [23].

Where there was a single cause of death, it was considered both the underlying and primary cause of death. The diagnosis of severe malnutrition was restricted to children between the ages of 1–59 months. If a baby was born showing signs of life but later died within the first 27 days of life, this was considered a neonatal death. Children born without any signs of life (as confirmed by several questions in the VA questionnaire) were classified as still births. For neonatal VA forms where a specific cause of death could not be assigned after reviewing all the signs and symptoms or where there was insufficient information in the VA form, the cause of death assigned was, unspecified perinatal cause of death. This approach is similar to other VA studies [24,25].

After coding, the results of both physicians were compared, and discrepancies were resolved by consensus among the two physicians. Causes of death were assigned using a short-list of deaths (S2 File) that could be ascertained from VA and mapped to the International Classification of Disease 10 codes. This list is contained in the 2016 WHO VA instrument [26].

## Data collection

Trained field workers undertake household visits within the Basse and Fuladu West HDSSs every 4 months. Data on all deaths, births, migrations, and pregnancies, are captured during visits. Verbal autopsies are conducted routinely after a grieving period of 40 days. The interviews are conducted using standardised closed-ended WHO VA questionnaires designed for neonates and children 1–59 months of age [27]. Field workers were trained on each item of the questionnaire and how to conduct interviews with respect and understanding. During interviews, the questions are translated by field workers from English into the appropriate local language of the respondent. Corresponding data is captured in a tablet application using the Research Electronic Data Capture (REDCap) application database system [28].

## Statistical analysis

All analyses were performed using Stata version 17 (StataCorp, College Station, TX, USA). Data were assessed for errors and missing values. Age was categorized into five groups:

stillbirths, neonates (0–27 days), 1–11 months, 12–23 months, and 24–59 months. Variables with few numbers were grouped as “other”. Summary statistics were performed for key characteristics such as socio-demographic factors, primary causes of death, underlying causes of death, and contextual factors (decision to seek care, access to medical care, and adequacy of care). The summary of the results is presented using frequency tables and percentages. Bivariate analysis using Chi-square test or the Fisher’s exact test was performed to determine possible association between some key socio-demographic factors and the top five neonatal and post-neonatal causes of death. We determined statistical significance at a p-value of  $\leq 0.05$ .

### **Ethical consideration**

The collection of VAs was undertaken by the Basse and Fuladu West HDSSs as part of safety surveillance in the Pneumococcal Vaccine Schedules trial. [22] The HDSSs include hundreds of thousands of residents and constitute minimal-risk observational research with data used by multiple research projects, non-government organisations, and government agencies. For these reasons, verbal consent was sought from the head of each household at each household visit and VA. The operation and procedures of both the Basse and Fuladu West HDSSs were approved by the Gambia Government/MRCG Joint Ethics Committee (reference: 1577) and the London School of Hygiene and Tropical Medicine Ethics Committee (reference: 14515).

## **Results**

### **Socio-demographic characteristics**

[Table 1](#) describes the socio-demographic characteristics of the evaluated deaths. Most of the deaths occurred in the neonatal period (32.3%,  $n = 209$ ). Outside of the neonatal period, 175 (27.0%) deaths occurred in the first year of life, 89 (13.8%) in the second year of life, and 143 (22.1%) occurred in children aged 24–59 months (22.1%,  $n = 143$ ). There were 31 (4.8%) stillbirths. There were comparable numbers of male and female deaths, with 324 (50.1%) females and 321 (49.6%) males. Most of the deaths occurred amongst the Serahule tribe (34.6%,  $n = 224$ ) and the Fula tribe (32.2%,  $n = 208$ ) which represent 32.5% and 39.3% of the under-5 years population in the study area. Almost all the respondents who gave information relating to the circumstances of the deaths were family members, with 92.9% ( $n = 601$ ) being the parent(s) of the deceased. During the period of illness that led to death, 97.5% ( $n = 631$ ) of the respondents lived with the deceased. Concerning seasonality, 39.9% ( $n = 258$ ) of the deaths occurred during the 5 months of the wet season. The majority of deaths occurred at home (49.5%,  $n = 319$ ).

### **Contextual factors**

In the final days of the illness, most parents knew that the deceased needed medical care (72.2%,  $n = 464$ ). However, care was not sought outside the home in 63.7% ( $n = 412$ ). For those who sought care outside the home, most (90.9%,  $n = 210$ ) went to a health facility (health centre and hospital). A few respondents used a mobile phone to call for help during the period of illness (12.3%,  $n = 79$ ). In most cases, the deceased was sent to a health facility in the final days of the illness (71.3%,  $n = 460$ ). Only few respondents reported living more than 2hrs journey from a health facility (11.8%,  $n = 76$ ). In 72.9% ( $n = 471$ ) of cases, the deceased received some form of treatment during the illness. For those who visited a health facility, only a few (1.7%,  $n = 8$ ) of respondents reported having problems with how the deceased were

**Table 1. Socio-demographic characteristics of the deceased.**

| Variables                                                        | Frequency (n = 647) * | Percentage (%) |
|------------------------------------------------------------------|-----------------------|----------------|
| <b>Age group</b>                                                 |                       |                |
| Stillbirths                                                      | 31                    | 4.8            |
| Neonates (0-27 days)                                             | 209                   | 32.3           |
| 1-11 months                                                      | 175                   | 27.0           |
| 12-23 months                                                     | 89                    | 13.8           |
| 24-59 months                                                     | 143                   | 22.1           |
| <b>Sex</b>                                                       |                       |                |
| Female                                                           | 324                   | 50.1           |
| Male                                                             | 321                   | 49.6           |
| <b>Ethnicity</b>                                                 |                       |                |
| Fula                                                             | 208                   | 32.2           |
| Serahule                                                         | 224                   | 34.6           |
| Wolof                                                            | 42                    | 6.5            |
| Mandinka                                                         | 162                   | 25.0           |
| Others                                                           | 11                    | 1.7            |
| <b>Relationship of respondent to the deceased</b>                |                       |                |
| Parent                                                           | 601                   | 92.9           |
| Family member                                                    | 43                    | 6.7            |
| Another relationship                                             | 3                     | 0.5            |
| <b>Did respondent live with the deceased during the illness?</b> |                       |                |
| Yes                                                              | 631                   | 97.5           |
| <b>Season of death</b>                                           |                       |                |
| Wet                                                              | 258                   | 39.9           |
| Dry                                                              | 389                   | 60.1           |
| <b>Place of death</b>                                            |                       |                |
| Home                                                             | 319                   | 49.5           |
| Hospital                                                         | 179                   | 27.8           |
| Other health facility                                            | 123                   | 19.1           |
| En route to the hospital                                         | 17                    | 2.6            |
| Other                                                            | 6                     | 0.9            |

\*Due to missing values, not all N values equal 647; sex = 2 missing values, Did the respondent live with the deceased = 7 missing values, Place of death = 3 missing values.

<https://doi.org/10.1371/journal.pone.0277377.t001>

treated (treatment, procedures, attitude, respect, dignity) in the hospital/health facility. A few respondents reported having challenges getting medications or diagnostic tests at health facilities (12.8%, n = 59) (Table 2).

### Primary causes of death

Of all deaths, acute respiratory infection including pneumonia (ARIP) (21.2%, n = 137), diarrhoeal diseases (14.7%, n = 95), sepsis (13.6%, n = 88) and unspecified perinatal causes of death (11.0%, n = 71) were the commonest primary causes of death (Table 3). S1 Table in the shows a further breakdown of causes of death in the neonatal and post-neonatal periods of life. In the neonatal period, unspecified perinatal causes of death (34.0%, n = 71), birth asphyxia (27.3%, n = 57) and prematurity/low birth weight (19.6%, n = 41) were the commonest causes of death. Outside the neonatal period, ARIP (33.7%, n = 137), diarrhoeal diseases (23.3%,

Table 2. Contextual factors associated with deaths.

| Contextual factor                                                                                            | Frequency (n = 647) * | Percentage (%) |
|--------------------------------------------------------------------------------------------------------------|-----------------------|----------------|
| <b>1. Decision to seek care</b>                                                                              |                       |                |
| <b>In the final days of illness, were there any doubts whether medical care was needed?</b>                  |                       |                |
| No                                                                                                           | 464                   | 72.2           |
| <b>Sought care outside home</b>                                                                              |                       |                |
| No                                                                                                           | 412                   | 63.7           |
| <b>Where was care sought?</b>                                                                                |                       |                |
| Traditional Healer                                                                                           | 7                     | 3.0            |
| Hospital                                                                                                     | 57                    | 24.7           |
| Health Centre                                                                                                | 153                   | 66.2           |
| Other                                                                                                        | 14                    | 6.1            |
| <b>In the final days of illness, did anyone use a phone to call for help?</b>                                |                       |                |
| Yes                                                                                                          | 79                    | 12.3           |
| <b>2. Access to medical care</b>                                                                             |                       |                |
| <b>Does it take more than 2hrs to get to the nearest hospital/health facility</b>                            |                       |                |
| Yes                                                                                                          | 76                    | 11.8           |
| <b>‡ In the final days before death, did s/he travel to a hospital or health facility?</b>                   |                       |                |
| Yes                                                                                                          | 460                   | 71.3           |
| <b>3. Adequacy of medical care</b>                                                                           |                       |                |
| <b>Did (s)he receive any treatment for the illness that led to death?</b>                                    |                       |                |
| Yes                                                                                                          | 471                   | 72.9           |
| <b>Were there any problems with the way (s)he was treated in the hospital or health facility †</b>           |                       |                |
| Yes                                                                                                          | 8                     | 1.7            |
| <b>Were there any problems getting medications or diagnostic tests in the hospital or health † facility?</b> |                       |                |
| Yes                                                                                                          | 59                    | 12.8           |

\* Due to missing data, not all N categories sum up to 647.

Missing values: In the final days of illness, were there any doubts whether medical care was needed? = 4 missing values, Sought care outside home = 4 missing values, In the final days of illness, did anyone use a phone to call for help? = 2 missing values, Does it take more than 2hrs to get to the nearest hospital/health facility = 2 missing values, In the final days before death, did s/he travel to a hospital or health facility? = 2 missing values, Did (s)he receive any treatment for the illness that led to death? = 1 missing value, Were there any problems with the way (s)he was treated in the hospital or health facility = 1 missing value.

‡ Question indicates whether the deceased had any contact with a health facility.

† Total frequency = 462.

<https://doi.org/10.1371/journal.pone.0277377.t002>

n = 95) and sepsis (21.6%, n = 88) were the commonest primary causes of death. Of note, there were few malaria deaths (0.8%, n = 5).

## Underlying causes of death

Severe malnutrition (28.6%, n = 185), ARIP (14.4%, n = 93), unspecified perinatal deaths (10.7%, n = 69), and prematurity/low birth weight (10.2%, n = 66) were the commonest underlying causes of death (Table 4). S2 Table in the shows a further breakdown of the underlying causes of death in the neonatal and post-neonatal periods of life. Of the neonatal deaths that were coded, 69 (30.0%) had an underlying cause recorded as unspecified perinatal neonatal deaths, 60 (26.1%) were associated with prematurity/low birth weight, and the underlying cause of death was unknown in 32 (13.9%) cases. Among the deaths which occurred outside of

**Table 3. Primary causes of death.**

| Primary cause of death                                 | Frequency (N = 647) | Percentage (%) |
|--------------------------------------------------------|---------------------|----------------|
| <b>All deaths</b>                                      |                     |                |
| Acute respiratory infection including Pneumonia (ARIP) | 137                 | 21.2           |
| Diarrhoeal diseases                                    | 95                  | 14.7           |
| Sepsis                                                 | 88                  | 13.6           |
| Unspecified perinatal cause of death                   | 71                  | 11.0           |
| Birth asphyxia                                         | 57                  | 8.8            |
| Prematurity/Low birth weight                           | 41                  | 6.3            |
| Fresh stillbirth                                       | 30                  | 4.6            |
| Meningitis                                             | 26                  | 4.0            |
| Severe anaemia                                         | 26                  | 4.0            |
| Cause of death unknown                                 | 24                  | 3.7            |
| Neonatal Sepsis                                        | 16                  | 2.5            |
| Road traffic accident                                  | 6                   | 0.9            |
| Malaria                                                | 5                   | 0.8            |
| Neonatal pneumonia                                     | 4                   | 0.6            |
| Others                                                 | 21                  | 3.2            |

<https://doi.org/10.1371/journal.pone.0277377.t003>

the neonatal period, severe malnutrition (45.2%, n = 184), ARIP (22.9%, n = 93), and sepsis (15.7%, n = 64) were the top three underlying causes of death.

### Factors associated with under-5 deaths

In the neonatal period, we did not find any significant association between sex and the top five primary causes of death (Table 5). While deaths from birth asphyxia (p-value<0.001) and Severe Anaemia (p = 0.03) were more likely to occur at hospitals, unspecified perinatal deaths

**Table 4. Underlying causes of death.**

| Underlying causes of death                        | Frequency (N = 647) | Percentage (%) |
|---------------------------------------------------|---------------------|----------------|
| <b>All deaths</b>                                 |                     |                |
| Severe malnutrition                               | 185                 | 28.6           |
| Acute respiratory infection (including Pneumonia) | 93                  | 14.4           |
| Unspecified perinatal cause of death              | 69                  | 10.7           |
| Prematurity/Low birth weight                      | 66                  | 10.2           |
| Sepsis                                            | 64                  | 9.9            |
| Cause of death unknown                            | 42                  | 6.5            |
| Fresh stillbirth                                  | 29                  | 4.5            |
| Birth Asphyxia                                    | 28                  | 4.3            |
| Neonatal Sepsis                                   | 13                  | 2.0            |
| Diarrhoeal diseases                               | 8                   | 1.2            |
| Malaria                                           | 8                   | 1.2            |
| Meningitis                                        | 8                   | 1.2            |
| Neonatal Pneumonia                                | 6                   | 0.9            |
| Road traffic accident                             | 6                   | 0.9            |
| Accidental fall                                   | 3                   | 0.5            |
| Contact with venomous animals and plants          | 3                   | 0.5            |
| Others                                            | 16                  | 2.5            |

<https://doi.org/10.1371/journal.pone.0277377.t004>



Table 5. Factors associated with neonatal deaths.

| Variable              | Top five neonatal primary causes of death |         |                |         |                                  |         |                 |         |                |         |
|-----------------------|-------------------------------------------|---------|----------------|---------|----------------------------------|---------|-----------------|---------|----------------|---------|
|                       | Unspecified perinatal deaths              |         | Birth asphyxia |         | Prematurity and Low birth weight |         | Neonatal Sepsis |         | Severe Anaemia |         |
|                       | n (%)                                     | p-value | n (%)          | p-value | n (%)                            | p-value | n (%)           | p-value | n (%)          | p-value |
| <b>Sex</b>            |                                           |         |                |         |                                  |         |                 |         |                |         |
| Female                | 34(35.8)                                  | 0.72    | 28(29.5)       | 0.77    | 19(20.0)                         | 0.87    | 4(4.2)          | 0.63    | 2(1.5)         | 0.31    |
| Male                  | 35(33.3)                                  |         | 29(27.6)       |         | 22(20.9)                         |         | 6(5.7)          |         | 5(4.8)         |         |
| <b>Place of death</b> |                                           |         |                |         |                                  |         |                 |         |                |         |
| Hospital              | 17(24.6)                                  | 0.01    | 33(47.8)       | <0.001  | 7(10.1)                          | 0.04    | 2(2.9)          | 0.36    | 6(8.7)         | 0.03    |
| Home                  | 39(46.4)                                  |         | 12(14.3)       |         | 19(22.6)                         |         | 4(4.8)          |         | 0(0.0)         |         |
| Other health facility | 10(25.0)                                  |         | 11(27.5)       |         | 13(32.5)                         |         | 4(10.0)         |         | 1(1.19)        |         |
| <b>Season</b>         |                                           |         |                |         |                                  |         |                 |         |                |         |
| Wet                   | 24(31.2)                                  | 0.43    | 19(24.7)       | 0.34    | 22(28.6)                         | 0.03    | 2(2.6)          | 0.22    | 4(5.2)         | 0.30    |
| Dry                   | 45(36.6)                                  |         | 38(30.9)       |         | 19(15.5)                         |         | 8(6.5)          |         | 3(2.4)         |         |

<https://doi.org/10.1371/journal.pone.0277377.t005>

were more likely to occur at home ( $p = 0.01$ ). Deaths associated with prematurity and low birth weight were more likely to occur at other health facilities ( $p = 0.04$ ) and in the wet season ( $p = 0.03$ ).

In the post-neonatal period, age was statistically associated with deaths from ARIP, diarrhoeal diseases, and sepsis (Table 6). Those aged 1–11 months were more likely to die from ARIP ( $p$ -value = 0.04) and sepsis ( $p$ -value = 0.05), while those aged 12–23 months were more likely to die from diarrhoeal diseases ( $p$ -value = 0.001). Sex, place of death and season were not found to be associated with the top five post-neonatal causes of death.

## Discussion

In this verbal autopsy analysis of deaths of children under-5 years of age in rural Gambia, we found that half of all deaths occurred at home. ARIP, diarrhoeal diseases, and sepsis were the

Table 6. Factors associated with post-neonatal primary causes of death.

| Variable              | Top five post-neonatal primary causes of death |         |                     |         |          |         |            |         |                |         |
|-----------------------|------------------------------------------------|---------|---------------------|---------|----------|---------|------------|---------|----------------|---------|
|                       | ARIP                                           |         | Diarrhoeal diseases |         | Sepsis   |         | Meningitis |         | Severe Anaemia |         |
|                       | n (%)                                          | p-value | n (%)               | p-value | n (%)    | p-value | n (%)      | p-value | n (%)          | p-value |
| <b>Age group</b>      |                                                |         |                     |         |          |         |            |         |                |         |
| 1–11 months           | 71(39.0)                                       | 0.04    | 28(15.5)            | 0.001   | 47(26.0) | 0.05    | 9(4.9)     | 0.24    | 6(3.3)         | 0.54    |
| 12–23 months          | 22(25.0)                                       |         | 31(35.2)            |         | 12(13.6) |         | 4(4.5)     |         | 5(5.7)         |         |
| 24–59 months          | 43(29.9)                                       |         | 36(25.0)            |         | 28(19.4) |         | 13(9.0)    |         | 8(5.6)         |         |
| <b>Sex</b>            |                                                |         |                     |         |          |         |            |         |                |         |
| Female                | 79(36.2)                                       | 0.09    | 49(22.5)            | 0.85    | 49(22.5) | 0.41    | 11(5.0)    | 0.28    | 12(5.5)        | 0.22    |
| Male                  | 57(28.6)                                       |         | 46(23.2)            |         | 38(19.2) |         | 15(7.6)    |         | 6(3.0)         |         |
| <b>Place of death</b> |                                                |         |                     |         |          |         |            |         |                |         |
| Hospital              | 36(35.3)                                       | 0.27    | 21(20.6)            | 0.62    | 23(22.6) | 0.86    | 7(6.9)     | 0.91    | 6(5.9)         | 0.95    |
| Home                  | 71(30.7)                                       |         | 55(23.9)            |         | 49(21.3) |         | 15(6.5)    |         | 10(4.3)        |         |
| Other health facility | 21(31.3)                                       |         | 18(26.9)            |         | 13(19.5) |         | 3(4.5)     |         | 3(4.5)         |         |
| <b>Season</b>         |                                                |         |                     |         |          |         |            |         |                |         |
| Wet                   | 55(32.7)                                       | 0.94    | 41(24.4)            | 0.52    | 41(24.4) | 0.14    | 10(5.9)    | 0.84    | 4(2.4)         | 0.08    |
| Dry                   | 81(32.4)                                       |         | 54(21.7)            |         | 46(18.5) |         | 16(6.4)    |         | 15(6.0)        |         |

<https://doi.org/10.1371/journal.pone.0277377.t006>

leading primary causes of death. Severe malnutrition contributed to nearly half of the post-neonatal deaths. The highest number of deaths was in the neonatal period with the commonest causes of death being unspecified perinatal deaths, birth asphyxia, and prematurity/low birth weight. We also found that though most of the respondents were aware that the deceased needed medical care and lived within 2hrs of a health facility, care was not sought outside the home in most cases.

One reason children may be dying at home is the reluctance of parents or caretakers to take them to the hospital when they are sick. This could be because they did not think the sickness was serious or they resorted to treatment at home. Another reason could be if treatment was sought in places other than health facilities. However, in this study, only a few caretakers reported seeking care from traditional healers or pharmacies. Other studies in Ghana, Rwanda and Ethiopia found a similarly high number of home deaths [29–31]. With substantial proportions of deaths occurring at home, mortality data generated through the use of VA should be considered as an adjunct to data from health facilities in characterizing under-5 deaths.

We also found that almost a third of deaths occurred in the neonatal period (32.3%). The high burden of deaths in the neonatal period was equally noted in an HDSS site in the northern part of India [32]. A significant proportion of births in The Gambia still occur without the supervision of skilled birth attendants and may be a contributing factor to the unacceptably high number of neonatal deaths [18]. From our experience, such neonates are often brought to the health facility a day or two after developing complications such as jaundice or sepsis.

Severe malnutrition and ARIP were the commonest underlying and primary causes of death respectively. This is similar to verbal autopsy studies in Ethiopia and Bangladesh where acute lower respiratory infection was the commonest cause of death [30,33]. In the latter study, childhood wasting was additionally identified as the leading risk factor for lower respiratory infections. This is corroborated by case-control studies from The Gambia and Brazil which identified malnutrition as the most important risk factor for pneumonia in children [34,35]. These findings highlight the synergistic role that acute malnutrition and respiratory infections play in causing the demise of many children. Apart from malnutrition, another risk factor that may have contributed to the high number of ARIP deaths is indoor pollution from the use of charcoal and firewood for cooking. This has been identified as a major risk factor contributing to pneumonia deaths in The Gambia [36–38]. Therefore, measures aimed at reducing ARIP deaths should also consider addressing malnutrition and indoor pollution from smoke.

Unspecified perinatal neonatal death was the commonest cause of death in the neonatal period. This is the case because of the challenge in assigning specific causes of death using verbal autopsy for neonates who die in the first few days of life. This challenge was equally recognised by Baqui et al., who in a nationwide verbal autopsy analysis grouped neonatal deaths in the first three days of life as early perinatal deaths without further specifying [33]. A similar verbal autopsy study in Angola also identified unspecified neonatal deaths as the commonest cause of death in the neonatal period [25]. In this study, a contributing factor could have been some skip pattern errors in some of the neonatal VA forms which resulted in some missing values. This further compounded the difficulty in assigning a specific cause of death in such cases.

One striking finding in this study was the low number of deaths attributable to malaria. In the past, malaria was a common cause of death in The Gambia but its incidence has fallen dramatically in recent years [39,40]. The current low prevalence of malaria in The Gambia is a result of multiple malaria control interventions, such as the use of insecticide-treated bed

nets, seasonal malaria chemoprophylaxis, effective treatment and community education [39–41].

The social circumstances that contributed to the deaths were grouped using the three delays model (decision to seek care, access to care, and adequacy of care) [42]. Even though most of the caretakers did not doubt that the deceased needed medical care at the time of the illness, a significant proportion did not seek care outside of the home. One reason could have been the issue of access to health facilities. However, the overwhelming majority reported that it did not take more than 2hrs to get to the nearest health facility. A second reason for the reluctance in seeking medical care could have been the (perceived) quality of care that children receive at health facilities. However, most of the respondents reported no problems in the way the children were treated, and in obtaining medications and other diagnostic tests. This may have been due to response bias.

Significant associations were noted between neonatal deaths and place of death. Deaths from birth asphyxia and severe anemia were more likely to occur at health facilities whereas unspecified perinatal deaths were more likely to occur at home. Deaths from birth asphyxia may be occurring more at health facilities because women who had complicated pregnancies or deliveries were likely to report to health facilities. However, late recognition of danger signs, lack of access to health facilities or delays in referral systems may have resulted in them receiving medical care too late, hence, giving birth to asphyxiated babies. More unspecified perinatal deaths may have been reported from home because of the inability of mothers to fully describe the signs and symptoms related to such deaths. Compared to children who die at home, those who die at health facilities are likely to be told the specific cause of death and the important symptoms by health workers.

In the post-neonatal period, ARIP and sepsis deaths were likely to occur in children aged 1–11 months while diarrhoeal deaths were likely to occur in children aged 12–23 months. Compared to older children, infants have a less resilient immune system and so are more likely to succumb to infections like ARIP. Also, diarrhoeal deaths may have been more in older children because the latter being more active and increasingly independent are more likely to consume contaminated food and water compared to younger children who are still fully dependent on their parents.

## Strengths/Limitations

A strength of our study is using WHO's standardised VA questionnaire (S3 File) and cause of death list (S2 File). The advantage of this is that it allows our results to be compared to similar studies conducted using the same questionnaire. The relatively large sample size in this study also strengthens the conclusions drawn. Another strength is that most of the respondents were first-degree relatives of the deceased, so more accurate information was likely to be collected.

However, VA analyses have some inherent limitations. Translation of the VA questionnaire from English to the local languages may have caused some meaning to be lost or misinterpreted. To mitigate this, only field workers who were fluent in the language and understood the culture and customs of the respondent were allowed to conduct such VAs. Possible recall bias is another well-known limitation of VA. To mitigate this in our study, we ensured that VAs were conducted as soon as possible, being mindful however of the need for relatives to mourn the deceased. It is also possible that some deaths remain unreported, despite HDSS procedures.

Validation studies comparing VA assigned causes of death to hospital records have shown mixed results [15,16,43]. Therefore, though deaths assigned using VA are important in settings

with weak systems for registering and determining causes of death, they should be interpreted with caution.

## Conclusions

Verbal autopsies are useful in assigning likely causes of child deaths in settings with weak CRVS systems. Half of the deaths amongst children aged under-5 in rural Gambia occur at home. ARIP and severe malnutrition are the commonest primary and underlying causes of death respectively. Though most respondents were aware of the need for medical care and lived close to health facilities, a significant proportion did not seek medical care.

We recommend the integration of VA methods in the national CRVS to ensure complete and accurate data on under-5 deaths. Improved health care and health-seeking behaviours through health education and promotion could contribute to reducing the number of under-5 deaths in rural Gambia. This, however, should be part of a comprehensive plan to improve health care at all levels including more trained personnel and improved logistics at health facilities.

## Supporting information

### **S1 Table. Primary causes of death.**

(DOCX)

### **S2 Table. Underlying causes of death.**

(DOCX)

### **S1 File. Minimal data set V 1.0.**

(DTA)

### **S2 File. VA Coding list\_V1.0.pdf.**

(PDF)

### **S3 File. WHO VA questionnaire.**

(XLSX)

## Acknowledgments

We thank all the grieving families who agreed to be part of this study. We also thank all the hardworking field workers who undertook the verbal autopsy interviews. We are grateful to the HDSS team at the Medical Research Council Unit The Gambia at the London School of Hygiene and Tropical Medicine for overseeing and supervising the collection of verbal autopsies.

## Author Contributions

**Conceptualization:** Baleng Mahama Wutor, Isaac Osei, Grant Mackenzie.

**Data curation:** Baleng Mahama Wutor, Isaac Osei, Lobga Babila Galega, Esu Ezeani, Williams Adefila, Ilias Hossain, Golam Sarwar, Grant Mackenzie.

**Formal analysis:** Baleng Mahama Wutor, Isaac Osei.

**Investigation:** Baleng Mahama Wutor, Isaac Osei, Esu Ezeani, Williams Adefila, Ilias Hossain, Grant Mackenzie.

**Methodology:** Baleng Mahama Wutor, Isaac Osei, Lobga Babila Galega, Grant Mackenzie.

**Software:** Golam Sarwar.

**Supervision:** Baleng Mahama Wutor, Isaac Osei, Lobga Babila Galega, Esu Ezeani, Williams Adefila, Ilias Hossain, Golam Sarwar, Grant Mackenzie.

**Validation:** Baleng Mahama Wutor, Isaac Osei, Lobga Babila Galega, Esu Ezeani, Williams Adefila, Ilias Hossain, Golam Sarwar, Grant Mackenzie.

**Writing – original draft:** Baleng Mahama Wutor.

**Writing – review & editing:** Baleng Mahama Wutor, Isaac Osei, Lobga Babila Galega, Esu Ezeani, Williams Adefila, Ilias Hossain, Golam Sarwar, Grant Mackenzie.

## References

1. Organization WH. Child mortality and causes of death 2022 [cited 2022 29/04/22]. <https://www.who.int/data/gho/data/themes/topics/indicator-groups/indicator-group-details/GHO/sdg-target-3.2-newborn-and-child-mortality>.
2. Nations UI-aGfCMEU. Levels & Trends in Child Mortality Report 2019, Estimates developed by the UN Inter-agency Group for Child Mortality Estimation United Nations. 2019.
3. Martha A, Robert E. B., Christopher C., Henry D. K., Maria A. Q., Ross R., et al. A standard verbal autopsy method for investigating causes of death in infants and children. World Health Organization, 1999.
4. Byass P. Who needs cause-of-death data? PLoS Medicine. 2007; 4(11):e333. <https://doi.org/10.1371/journal.pmed.0040333> PMID: 18031198
5. Boerma T, Requejo J, Victora CG, Amouzou A, George A, Agyepong I, et al. Countdown to 2030: tracking progress towards universal coverage for reproductive, maternal, newborn, and child health. The Lancet. 2018; 391(10129):1538–48. [https://doi.org/10.1016/S0140-6736\(18\)30104-1](https://doi.org/10.1016/S0140-6736(18)30104-1) PMID: 29395268
6. Mathers CD, Ma Fat D, Inoue M, Rao C, Lopez AD. Counting the dead and what they died from: an assessment of the global status of cause of death data. Bulletin of the world health organization. 2005; 83:171–7c. PMID: 15798840
7. Baiden F, Bawah A, Biai S, Binka F, Boerma T, Byass P, et al. Setting international standards for verbal autopsy. SciELO Public Health; 2007. p. 570–1. <https://doi.org/10.2471/blt.07.043745> PMID: 17768508
8. Leitao J, Chandramohan D, Byass P, Jakob R, Bundhamcharoen K, Choprapawon C, et al. Revising the WHO verbal autopsy instrument to facilitate routine cause-of-death monitoring. Global health action. 2013; 6(1):21518. <https://doi.org/10.3402/gha.v6i0.21518> PMID: 24041439
9. Baiden F, Hodgson A, Binka FN. Demographic surveillance sites and emerging challenges in international health. Bulletin of the World Health Organization. 2006; 84:163-. <https://doi.org/10.2471/blt.05.025577> PMID: 16583067
10. Tran HT, Nguyen HP, Walker SM, Hill PS, Rao C. Validation of verbal autopsy methods using hospital medical records: a case study in Vietnam. BMC medical research methodology. 2018; 18(1):1–10.
11. Ganapathy SS, Yi KY, Omar MA, Anuar MFM, Jeevananthan C, Rao C. Validation of verbal autopsy: determination of cause of deaths in Malaysia 2013. BMC public health. 2017; 17(1):1–8.
12. Soleman N, Chandramohan D, Shibuya K. Verbal autopsy: current practices and challenges. Bulletin of the World Health Organization. 2006; 84:239–45. <https://doi.org/10.2471/blt.05.027003> PMID: 16583084
13. Quigley MA, Chandramohan D, Setel P, Binka F, Rodrigues LC. Validity of data-derived algorithms for ascertaining causes of adult death in two African sites using verbal autopsy. Tropical Medicine & International Health. 2000; 5(1):33–9. <https://doi.org/10.1046/j.1365-3156.2000.00517.x> PMID: 10672203
14. Byass P, Huong DL, Van Minh H. A probabilistic approach to interpreting verbal autopsies: methodology and preliminary validation in Vietnam. Scandinavian Journal of Public Health. 2003; 31(62\_suppl):32–7. <https://doi.org/10.1080/14034950310015086> PMID: 14649636
15. Uneke CJ, Uro-Chukwu HC, Chukwu OE. Validation of verbal autopsy methods for assessment of child mortality in sub-Saharan Africa and the policy implication: a rapid review. The Pan African Medical Journal. 2019; 33. <https://doi.org/10.11604/pamj.2019.33.318.16405> PMID: 31692720
16. Mahesh BP, Hart JD, Acharya A, Chowdhury HR, Joshi R, Adair T, et al. Validation studies of verbal autopsy methods: a systematic review. BMC public health. 2022; 22(1):1–8.

17. Yé M, Diboulo E, Niamba L, Sié A, Coulibaly B, Bagagnan C, et al. An improved method for physician-certified verbal autopsy reduces the rate of discrepancy: experiences in the Nouna Health and Demographic Surveillance Site (NHDSS), Burkina Faso. *Population health metrics*. 2011; 9(1):1–9.
18. Statistics TGB. The Gambia multiple indicator cluster survey 2018: survey findings report. July 2019.
19. Mackenzie GA, Hill PC, Jeffries DJ, Hossain I, Uchendu U, Ameh D, et al. Effect of the introduction of pneumococcal conjugate vaccination on invasive pneumococcal disease in The Gambia: a population-based surveillance study. *The Lancet infectious diseases*. 2016; 16(6):703–11. [https://doi.org/10.1016/S1473-3099\(16\)00054-2](https://doi.org/10.1016/S1473-3099(16)00054-2) PMID: 26897105
20. Quattrochi J, Jasseh M, Mackenzie G, Castro MC. Spatial analysis of under-5 mortality and potential risk factors in the Basse Health and Demographic Surveillance System, the Gambia. *Tropical Medicine & International Health*. 2015; 20(7):941–51. <https://doi.org/10.1111/tmi.12490> PMID: 25728631
21. Scott S, Odotola A, Mackenzie G, Fulford T, Afolabi MO, Jallow YL, et al. Coverage and timing of children's vaccination: an evaluation of the expanded programme on immunisation in the Gambia. *PLoS one*. 2014; 9(9):e107280. <https://doi.org/10.1371/journal.pone.0107280> PMID: 25232830
22. Mackenzie GA, Osei I, Salaudeen R, Hossain I, Young B, Secka O, et al. A cluster-randomised, non-inferiority trial of the impact of a two-dose compared to three-dose schedule of pneumococcal conjugate vaccination in rural Gambia: the PVS trial. *Trials*. 2022; 23(1):1–23.
23. Classification of causes of death [Internet]. [cited 27/09/2022]. <https://www.who.int/standards/classifications/classification-of-diseases/cause-of-death>.
24. Odejimi A, Quinley J, Eluwa GI, Kunnuji M, Wammanda RD, Weiss W, et al. Causes of deaths in neonates and children aged 1–59 months in Nigeria: verbal autopsy findings of 2019 Verbal and Social Autopsy study. *BMC Public Health*. 2022; 22(1):1–15.
25. Rosário EVN, Costa D, Timóteo L, Rodrigues AA, Varanda J, Nery SV, et al. Main causes of death in Dande, Angola: results from Verbal Autopsies of deaths occurring during 2009–2012. *BMC public health*. 2016; 16(1):1–15. <https://doi.org/10.1186/s12889-016-3365-6> PMID: 27491865
26. Organization WH. Verbal autopsy standards: The 2016 WHO verbal autopsy instrument 2016. <https://www.who.int/publications/m/item/verbal-autopsy-standards-the-2016-who-verbal-autopsy-instrument>.
27. Organization WH. Verbal autopsy standards: ascertaining and attributing cause of death: World Health Organization; 2007.
28. Harris PA, Taylor R, Minor BL, Elliott V, Fernandez M, O'Neal L, et al. The REDCap consortium: Building an international community of software platform partners. *Journal of biomedical informatics*. 2019; 95:103208. <https://doi.org/10.1016/j.jbi.2019.103208> PMID: 31078660
29. Gupta N, Hirschhorn LR, Rwabukwisi FC, Drobac P, Sayinzoga F, Mugeni C, et al. Causes of death and predictors of childhood mortality in Rwanda: a matched case-control study using verbal social autopsy. *BMC public health*. 2018; 18(1):1–9. <https://doi.org/10.1186/s12889-018-6282-z> PMID: 30558586
30. Mebrahtom S, Worku A, Gage DJ. Causes of infant deaths and patterns of associated factors in Eastern Ethiopia: Results of verbal autopsy (InterVA-4) study. *PLoS one*. 2022; 17(8):e0270245. <https://doi.org/10.1371/journal.pone.0270245> PMID: 35925957
31. Manortey S, Carey A, Ansong D, Harvey R, Good B, Boaheng J, et al. Verbal autopsy: an analysis of the common causes of childhood death in the Barekese sub-district of Ghana. *Journal of Public Health in Africa*. 2011; 2(2). <https://doi.org/10.4081/jphia.2011.e18> PMID: 28299059
32. Rai SK, Kant S, Srivastava R, Gupta P, Misra P, Pandav CS, et al. Causes of and contributors to infant mortality in a rural community of North India: evidence from verbal and social autopsy. *BMJ open*. 2017; 7(8):e012856. <https://doi.org/10.1136/bmjopen-2016-012856> PMID: 28801384
33. Baqui AH, Black RE, Arifeen S, Hill K, Mitra S, Al Sabir A. Causes of childhood deaths in Bangladesh: results of a nationwide verbal autopsy study. *Bulletin of the World Health Organization*. 1998; 76(2):161. PMID: 9648357
34. Fonseca W, Kirkwood BR, Victora CG, Fuchs S, Flores J, Misago C. Risk factors for childhood pneumonia among the urban poor in Fortaleza, Brazil: a case—control study. *Bulletin of the World Health Organization*. 1996; 74(2):199. PMID: 8706236
35. Howie SR, Schellenberg J, Chimah O, Ideh RC, Ebruke BE, Oluwalana C, et al. Childhood pneumonia and crowding, bed-sharing and nutrition: a case-control study from The Gambia. *The international journal of tuberculosis and lung disease*. 2016; 20(10):1405–15. <https://doi.org/10.5588/ijtld.15.0993> PMID: 27725055
36. Armstrong JR, Campbell H. Indoor airpollution exposure and lower respiratory infections in young Gambian children. *International journal of epidemiology*. 1991; 20(2):424–9. <https://doi.org/10.1093/ije/20.2.424> PMID: 1917245

37. O'dempsey T, McArdle T, Morris J, Lloyd-Evans N, I B, Laurence B, et al. A study of risk factors for pneumococcal disease among children in a rural area of West Africa. *International journal of epidemiology*. 1996; 25(4):885–93. <https://doi.org/10.1093/ije/25.4.885> PMID: 8921471
38. Koffi AK, Wounang RS, Nguéfack F, Moluh S, Libite PR, Kalter HD. Sociodemographic, behavioral, and environmental factors of child mortality in Eastern Region of Cameroon: results from a social autopsy study. *Journal of global health*. 2017; 7(1). <https://doi.org/10.7189/jogh.07.010601> PMID: 28400957
39. Ceesay SJ, Casals-Pascual C, Erskine J, Anya SE, Duah NO, Fulford AJ, et al. Changes in malaria incidences between 1999 and 2007 in The Gambia: a retrospective analysis. *The Lancet*. 2008; 372(9649):1545–54. [https://doi.org/10.1016/S0140-6736\(08\)61654-2](https://doi.org/10.1016/S0140-6736(08)61654-2) PMID: 18984187
40. Ceesay SJ, Casals-Pascual C, Nwakanma DC, Walther M, Gomez-Escobar N, Fulford AJ, et al. Continued decline of malaria in The Gambia with implications for elimination. *PloS one*. 2010; 5(8):e12242. <https://doi.org/10.1371/journal.pone.0012242> PMID: 20805878
41. International TGNMPaU. The Gambia Malaria Survey 2017. In: Statistics TGBo, editor. 2018. p. 47.
42. Thaddeus S, Maine D. Too far to walk: maternal mortality in context. *Social science & medicine*. 1994; 38(8):1091–110. [https://doi.org/10.1016/0277-9536\(94\)90226-7](https://doi.org/10.1016/0277-9536(94)90226-7) PMID: 8042057
43. Bailo P, Gibelli F, Ricci G, Sirignano A. Verbal autopsy as a tool for defining causes of death in specific healthcare contexts: study of applicability through a traditional literature review. *International journal of environmental research and public health*. 2022; 19(18):11749. <https://doi.org/10.3390/ijerph191811749> PMID: 36142022
